# Supplementary material
Source: PubMed Central journal article supplement (PMC9545553)
Supplement: OBY-30-1411-s001.pdf [file OBY-30-1411-s001.pdf]

## SUPPLEMENTARY MATERIAL

Higher protein intake during caloric restriction improves diet quality and attenuates loss of lean body mass. Ogilvie, AR, Schlussek Y, Sukumar D, Meng L, Shapses SA.

---

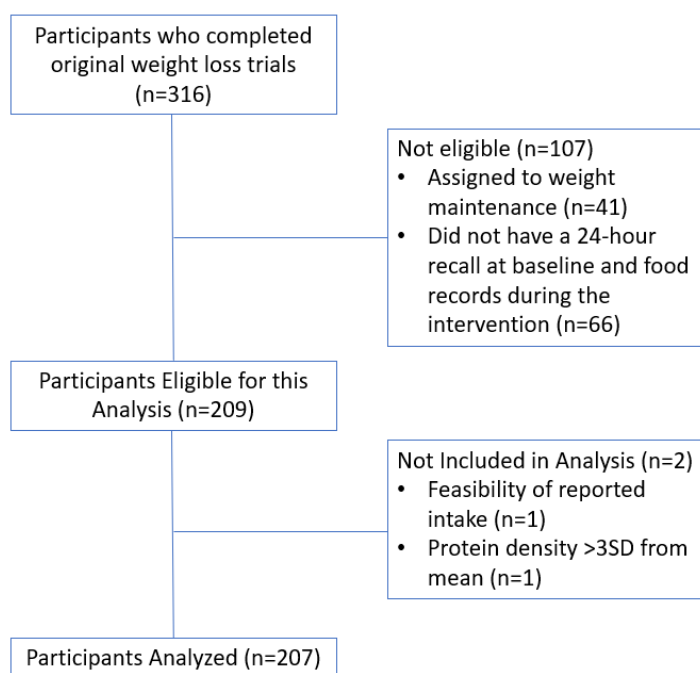

**Figure S1.** Flow diagram of participants

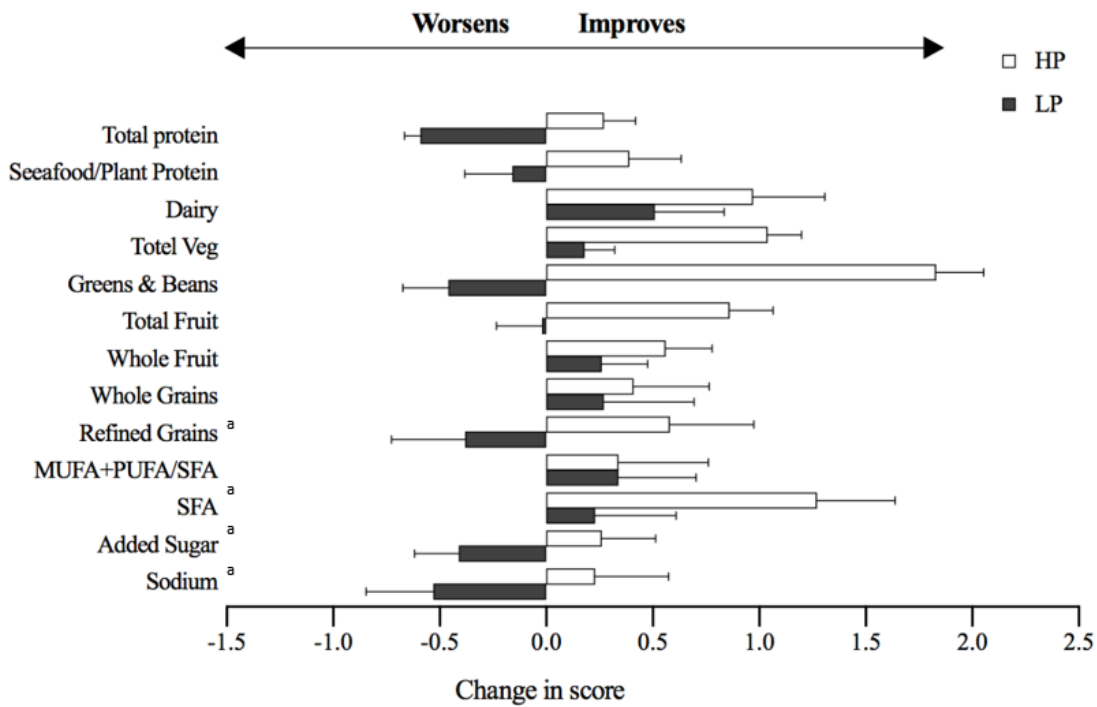

**Figure S2.** Change in diet quality scores for food categories in the HEI-2015 due to caloric restriction in the higher (HP) and lower (LP) protein groups.

Values are reported as Mean  $\pm$  SEM. The change in protein intake from baseline to caloric restriction differed ( $p < 0.001$ ) between the LP group ( $-32.0 \pm 20.1$  g/d) and the HP group ( $13.1 \pm 13.6$  g/d).

<sup>a</sup> Indicates HEI moderation component (for these categories, a higher score indicates lower intake).

Values are significantly different between HP and LP groups for total protein, greens and beans, and refined grains ( $p < 0.001$ ) and showed a trend to differ for seafood & plant proteins and dairy ( $p < 0.09$ ). Abbreviations: Healthy eating index-2015 (HEI), monounsaturated fat (MUFA), polyunsaturated fat (PUFA), saturated fat (SFA)

**Table S1:** Enrollment, objectives, and endpoints for weight loss trials in this study (OWLE database)

| <b>Trial</b>                                             | NIHMS576257*                                                                                                                      | NIHMS576252*                                                                                                                                   | NCT00473031                                                                                                                                  | NCT00472745                                                                                             | NCT01631292                                                                                                                                            |
|----------------------------------------------------------|-----------------------------------------------------------------------------------------------------------------------------------|------------------------------------------------------------------------------------------------------------------------------------------------|----------------------------------------------------------------------------------------------------------------------------------------------|---------------------------------------------------------------------------------------------------------|--------------------------------------------------------------------------------------------------------------------------------------------------------|
| <b>Participants enrolled (n)</b>                         | 73                                                                                                                                | 58                                                                                                                                             | 60                                                                                                                                           | 44                                                                                                      | 81                                                                                                                                                     |
| <b>Enrollment period</b>                                 | 2000-2003                                                                                                                         | 2002-2004                                                                                                                                      | 2005-2008                                                                                                                                    | 2007-2012                                                                                               | 2012-2015                                                                                                                                              |
| <b>Population characteristics (BMI kg/m<sup>2</sup>)</b> | Female<br>50-75 y<br>BMI 25-40                                                                                                    | Female<br>25-49 y<br>BMI 25-40                                                                                                                 | Female<br>50-70 y<br>BMI 25-40                                                                                                               | Male<br>50-72 y<br>BMI 25-39.9                                                                          | Female<br>50-70 y<br>BMI 25-40                                                                                                                         |
| <b>Trial duration (months)</b>                           | 6                                                                                                                                 | 6                                                                                                                                              | 12                                                                                                                                           | 6                                                                                                       | 12                                                                                                                                                     |
| <b>Objectives</b>                                        | To examine hormonal mechanisms regulating bone turnover and mass and the role of Ca intake during weight reduction. <sup>21</sup> | To determine whether bone loss is observed with moderate weight loss at recommended or higher Ca intakes in premenopausal women. <sup>22</sup> | To examine higher protein compared with normal protein intake on BMD during CR with recommended calcium and vitamin D intakes. <sup>23</sup> | To examine variables of bone quality and endocrine changes after intentional weight loss. <sup>20</sup> | To determine whether there is a dose-dependent effect of vitamin D3 supplementation on BMD, geometry, strength, and bone microstructure. <sup>19</sup> |
| <b>Primary Endpoints</b>                                 | Bone mineral density and bone mineral content                                                                                     | Bone mineral density                                                                                                                           | Bone mineral density (areal & volumetric), bone turnover markers                                                                             | Bone mineral density and bone structural parameters                                                     | Bone mineral density and bone structural parameters                                                                                                    |
| <b>Secondary Endpoints</b>                               | Parathyroid hormone (PTH) 25OHD                                                                                                   | True fractional calcium absorption                                                                                                             | Hormones IGF- 1, 25OHD, PTH)                                                                                                                 | 25OHD, total testosterone, estradiol, SHBG, and albumin                                                 | Bone turnover and serum total, free, and bioavailable 25OHD                                                                                            |

\*Clinical trials were conducted before registration of trials became routine practice (NIHMS number refers to the original articles). Abbreviations: body mass index (BMI); bone mineral density (BMD); caloric restriction (CR), Osteoporosis, Weight loss and Endocrine, OWLE; sex hormone binding globulin, SHBG, 25-hydroxyvitamin D<sub>3</sub> (25OHD).

**Table S2:** Regression coefficients and 95% CI of protein sources on the change in total protein intake due to caloric restriction in 207 adults with obesity and overweight

| Food Item               | $\beta$ coefficient (95% CI) | P value          |
|-------------------------|------------------------------|------------------|
| Poultry                 | 6.799 (5.866, 7.731)         | <b>&lt;0.001</b> |
| Meat <sup>a</sup>       | 6.138 (5.034, 7.243)         | <b>&lt;0.001</b> |
| Seafood                 | 5.160 (4.099, 6.222)         | <b>&lt;0.001</b> |
| Cured Meat <sup>b</sup> | 5.022 (3.715, 6.328)         | <b>&lt;0.001</b> |
| Cheese                  | 7.549 (4.759, 10.339)        | <b>&lt;0.001</b> |
| Milk                    | 7.372 (4.195, 10.549)        | <b>&lt;0.001</b> |
| Eggs                    | 6.056 (3.146, 8.965)         | <b>&lt;0.001</b> |
| Nuts and Seeds          | 2.254 (0.807, 3.700)         | <b>0.002</b>     |
| Yogurt                  | 2.483 (-4.930, 9.895)        | 0.510            |
| Organ Meat              | -1.89 (-9.437, 5.658)        | 0.622            |
| Soy                     | 1.072 (-5.659, 7.804)        | 0.754            |
| Legumes                 | -0.013 (-2.320, 2.294)       | 0.991            |

Controlled for energy, age, sex, and BMI.  $R^2=0.698$ ; Values are bolded when  $p < 0.05$

<sup>a</sup> Meat does not include poultry, or any organ or cured meat.

<sup>b</sup> Cured meats reflects all sliced deli meats including turkey.

Note: Other minimally consumed sources of protein (algae, insects, etc.), were not included because they are not reported by the USA version of the ASA nutrient analysis output.

**Table S3.** Regression coefficients and 95% CI for change in food components contributing to the change in the Healthy Eating Index (HEI) due to caloric restriction in 207 adults with obesity and overweight

| Dietary variables     | Model 1                      |                  | Model 2                      |                  |
|-----------------------|------------------------------|------------------|------------------------------|------------------|
|                       | $\beta$ coefficient (95% CI) | P value          | $\beta$ coefficient (95% CI) | P value          |
| Total Protein         | 0.552 (-0.229, 1.332)        | 0.165            | 0.581 (-0.21, 1.372)         | 0.149            |
| Seafood/Plant Protein | 1.042 (0.636, 1.448)         | <b>0.000</b>     | 1.045 (0.631, 1.458)         | <b>0.000</b>     |
| Total Dairy           | 0.307 (0.052, 0.563)         | <b>0.019</b>     | 0.312 (0.054, 0.570)         | <b>0.018</b>     |
| Total Vegetables      | 0.457 (-0.177, 1.09)         | 0.157            | 0.431 (-0.216, 1.078)        | 0.191            |
| Greens & Beans        | 0.606 (0.194, 1.019)         | <b>0.004</b>     | 0.615 (0.195, 1.036)         | <b>0.003</b>     |
| Total Fruit           | 1.837 (1.018, 2.656)         | <b>0.000</b>     | 1.818 (0.987, 2.648)         | <b>0.000</b>     |
| Whole Fruit           | 0.462 (-0.267, 1.190)        | 0.213            | 0.464 (-0.273, 1.202)        | 0.216            |
| Whole Grains          | 0.987 (0.738, 1.236)         | <b>&lt;0.001</b> | 0.972 (0.718, 1.227)         | <b>&lt;0.001</b> |
| Refined Grains        | 0.887 (0.621, 1.153)         | <b>&lt;0.001</b> | 0.893 (0.624, 1.162)         | <b>&lt;0.001</b> |
| MUFA+PUFA/SFA         | 0.519 (0.219, 0.819)         | <b>&lt;0.001</b> | 0.524 (0.215, 0.833)         | <b>&lt;0.001</b> |
| SFA                   | 0.746 (0.424, 1.069)         | <b>&lt;0.001</b> | 0.744 (0.415, 1.072)         | <b>&lt;0.001</b> |
| Added Sugar           | 0.178 (-0.261, 0.617)        | 0.426            | 0.175 (-0.272, 0.622)        | 0.441            |
| Sodium                | 0.306 (0.042, 0.569)         | <b>0.023</b>     | 0.316 (0.048, 0.584)         | <b>0.021</b>     |

The models (1 and 2) include food components that contribute to HEI. Model 1 is unadjusted, and Model 2 is adjusted for age, sex, and body mass index. Values are bolded when  $< 0.05$ . Abbreviations: caloric restriction (CR); monounsaturated fatty acids (MUFA); polyunsaturated fatty acid (PUFA), saturated fatty acids (SFA).
